# Supplementary material for: Environmental Factors Associated With Loa loa Microfilaria Prevalence and Intensity in Diverse Bioecological Zones of Cameroon
Source: Frontiers journal article supplement (doi:10.3389/fitd.2021.668641), 2021-05-12
Supplement: Data_Sheet_1.XLSX [file Data_Sheet_1.XLSX]

## Sheet: Sheet1
Regions	Zones	Regions_code	Zones_code	Villages	Prevalence	Prevalence_group	Prevalence_group_code	Arithmetic	Geometric	Median	Bio1 - Temperature	Bio12 - Precipitation	Elevation	Tree cover	Tree canopy height	Land cover_majority
Savannah	Grassland	1	2	Bansobi	0	0	0	0	0	0	214.433	1866.47	1308.63	23.3567	8.125	130
Savannah	Grassland	1	2	Dzeng	0	0	0	0	0	0	190	1866.39	1747	25.632	7.5625	130
Savannah	Grassland	1	2	Kifem I	0	0	0	0	0	0	185.2	1865.67	1833.33	31.9127	10.7812	130
Savannah	Grassland	1	2	Lam	0	0	0	0	0	0	189.75	1852.57	1751.68	23.7481	4.96875	130
Savannah	Grassland	1	2	Njanawa	0	0	0	0	0	0	195.643	1862.07	1646.46	23.4484	4.90625	130
Savannah	Grassland	1	2	Rifem	0	0	0	0	0	0	183.75	1855.71	1859.54	24.2272	8.25	130
Savannah	Grassland	1	2	Tanyar	0	0	0	0	0	0	204.893	1859.39	1482.29	25.9266	7.34375	130
Savannah	Grassland	1	2	Yang	0	0	0	0	0	0	190	1866.39	1747	25.632	7.5625	130
Savannah	Mosaic Forest	1	3	Bern	2.52	0 - 20 %	1	45	1204	2260	230.567	1888.17	996.767	25.1418	15.2188	60
Savannah	Mosaic Forest	1	3	Chunghe	1.28	0 - 20 %	1	224	17460	17460	230.967	1883.87	989.5	27.1139	15.4688	60
Savannah	Mosaic Forest	1	3	Kamine	3.2	0 - 20 %	1	50	602	1210	230.167	1857.4	1003.53	25.5487	14.0625	60
Savannah	Mosaic Forest	1	3	Kibbo	3.19	0 - 20 %	1	215	1103	4200	223.133	1885.6	1140.73	30.4654	14.8438	60
Savannah	Mosaic Forest	1	3	Lip	2.26	0 - 20 %	1	208	2441	10800	242.821	1873.93	768.357	25.2731	9.2	60
Savannah	Mosaic Forest	1	3	Mbissa	2.61	0 - 20 %	1	5	60	20	231.467	1848.93	975.933	21.8496	14.875	60
Savannah	Mosaic Forest	1	3	Mfume	7.35	0 - 20 %	1	603	1480	1820	227.2	1884.83	1062.5	29.5544	16.3125	60
Savannah	Mosaic Forest	1	3	Nkanchi	0.68	0 - 20 %	1	14	2040	2040	230.633	1871.87	994.233	26.082	15.1875	60
Equatorial Rainforest	Deciduous	0	0	Assam	7.02	0 - 20 %	1	1021	917	3500	265.969	2485.31	139.188	73.79	30.2667	40
Equatorial Rainforest	Deciduous	0	0	Bache	7.03	0 - 20 %	1	171	673	1490	266.406	2555.94	126.812	72.9778	30.0667	40
Equatorial Rainforest	Deciduous	0	0	Kesham	8.62	0 - 20 %	1	488	1879	3240	266.875	2650.69	103.062	69.0352	28.8387	40
Equatorial Rainforest	Deciduous	0	0	Obonyi 1	5.79	0 - 20 %	1	149	515	1080	264.464	2345.18	179.893	75.6287	30.6875	40
Equatorial Rainforest	Deciduous	0	0	Obonyi 3	6.29	0 - 20 %	1	139	520	760	263.536	2346.36	198.714	75.0134	31.6875	40
Equatorial Rainforest	Deciduous	0	0	Okpambe	2.22	0 - 20 %	1	1	60	60	266.438	2537.25	129.438	72.5796	28.9	40
Equatorial Rainforest	Deciduous	0	0	Takamanda	8.21	0 - 20 %	1	133	318	340	266.344	2485.25	132.062	73.6037	29.7667	40
Equatorial Rainforest	Dense-humid	0	1	Ajaman	5.68	0 - 20 %	1	35	162	200	253.094	2762.72	280.25	80.7993	36.5312	40
Equatorial Rainforest	Dense-humid	0	1	Akwa	4.55	0 - 20 %	1	314	462	80	250.594	2751.59	323.375	79.4588	36.7143	40
Equatorial Rainforest	Dense-humid	0	1	Araru	13.3	0 - 20 %	1	294	1380	2110	261.219	2731.28	176.156	73.8209	35.2	40
Equatorial Rainforest	Dense-humid	0	1	Babi	19.2	0 - 20 %	1	675	4359	4430	255.031	2734.28	264.594	76.0818	36.8929	40
Equatorial Rainforest	Dense-humid	0	1	Babong	11	0 - 20 %	1	400	732	2340	260.812	2755.22	181.188	70.7017	33.3333	40
Equatorial Rainforest	Dense-humid	0	1	Ekoneman	4.17	0 - 20 %	1	189	4540	4540	253.469	2776.34	271.594	81.025	37.0938	40
Equatorial Rainforest	Dense-humid	0	1	Mbofong	7.69	0 - 20 %	1	416	4507	4480	245.938	2712.62	413.188	78.4858	35.8571	40
Equatorial Rainforest	Dense-humid	0	1	Nkogho	16.8	0 - 20 %	1	1178	940	1960	262.156	2778.97	158.188	73.0536	33.6667	40
Equatorial Rainforest	Dense-humid	0	1	Ogurang	5.06	0 - 20 %	1	213	1632	3960	255.031	2734.28	264.594	76.0818	36.8929	40
Savannah	Forested	1	4	Jator	9.91	0 - 20 %	1	1349	8090	6340	231.733	1794.37	994.167	32.7776	10.25	60
Savannah	Forested	1	4	Mbiripkwa	41.4	> 40 %	3	2068	710	900	234.667	1800.03	939.133	39.0949	12.8438	60
Savannah	Forested	1	4	Ngomkow	10.6	0 - 20 %	1	170	831	960	242.531	1774.47	789.75	27.815	8.84375	60
Savannah	Forested	1	4	Ngu	43.8	> 40 %	3	4757	1623	1500	239.267	1802.8	850.7	40.5862	13.2812	60
Savannah	Forested	1	4	Nguri	50.5	> 40 %	3	9995	2989	2320	239.133	1806.2	853.467	39.7459	12.1875	60
Savannah	Forested	1	4	Nking	54.2	> 40 %	3	5457	1810	1860	237.5	1801.67	883.767	39.8478	13.5625	60
Savannah	Forested	1	4	Ntem	32.6	20 - 40 %	2	2709	1432	1560	243.433	1821.13	768.5	25.7557	3.875	130
Savannah	Forested	1	4	Nwanti	44.9	> 40 %	3	2608	1392	1690	242.7	1812.3	786.333	33.454	9.34375	60
Savannah	Forested	1	4	Nwat	34.6	20 - 40 %	2	1865	1637	3270	236.467	1792.5	905.933	36.4198	11.0312	60
Savannah	Forested	1	4	Sabongari	10.5	0 - 20 %	1	794	991	1710	244.067	1774.47	762.1	27.1683	9.53125	60
